# Supplementary material
Source: Springer Nature journal article supplement (https://www.springermedizin.de/resource/supplementary/12936_2008_655_MOESM4_ESM.pdf/9547928)

Mean (95%CI) birthweight in grams

3100  
2900  
2700  
2500

Primigravidae

Secundigravidae

2750

2730

2677

2972

2912

2959

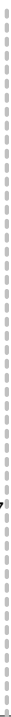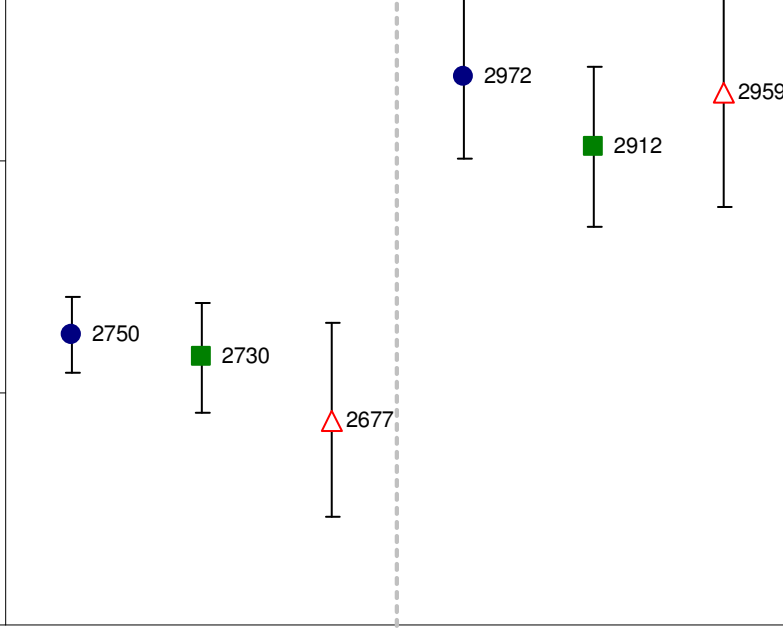

Supplement: MOESM4 [file 9547928]
